# Supplementary material for: Warming and leaf litter functional diversity, not litter quality, drive decomposition in a freshwater ecosystem
Source: PubMed Central journal article supplement (PMC7684280; doi:10.1038/s41598-020-77382-7), 2020-11-23
Supplement: 41598_2020_77382_MOESM1_ESM.pdf [file 41598_2020_77382_MOESM1_ESM.pdf]

# Warming and leaf litter functional diversity, not litter quality, drive decomposition in a freshwater ecosystem

Gustavo H. Migliorini and Gustavo Q. Romero

## Supplementary Information

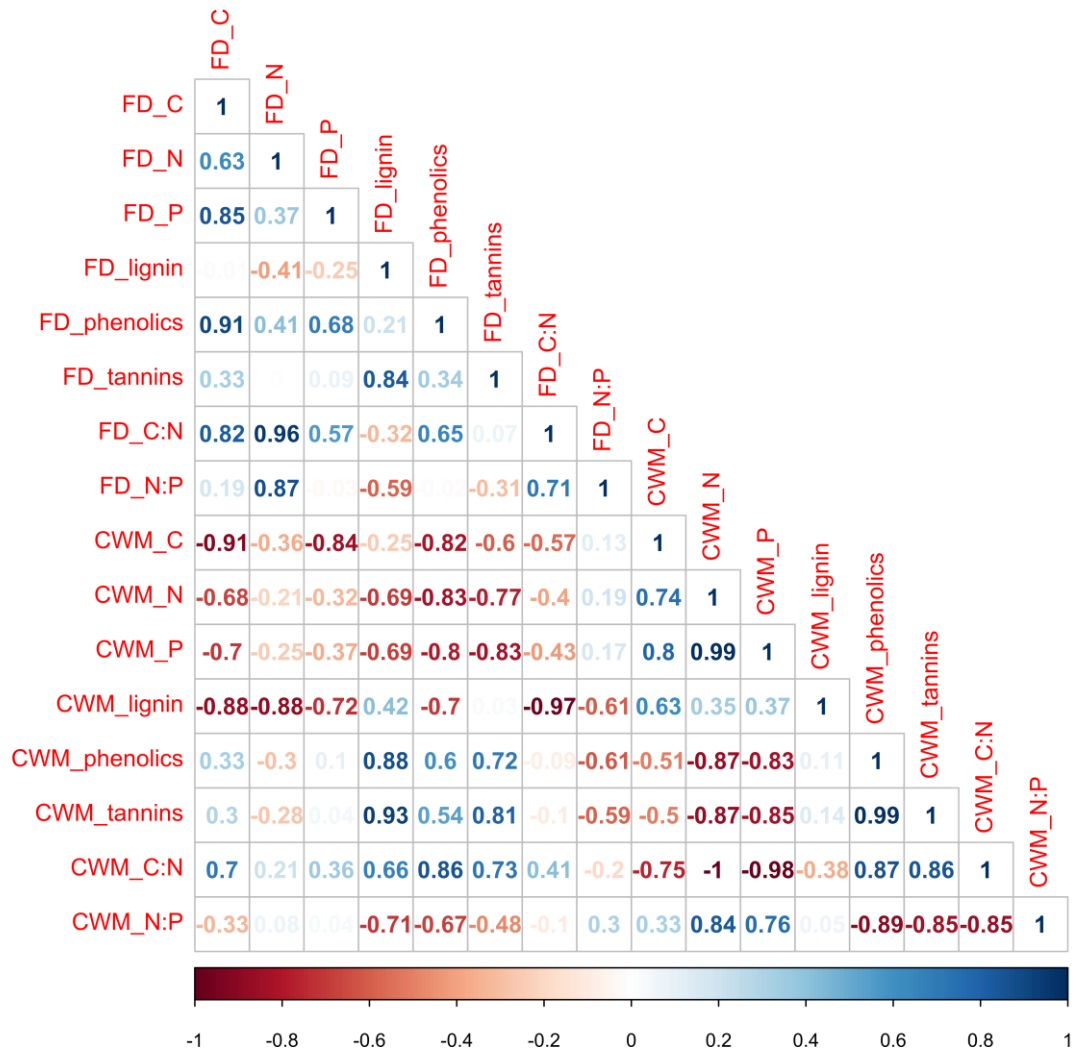

Figure S1. Correlation table between CWM and Rao's Q values of each litter trait measured for the 12 litter species.

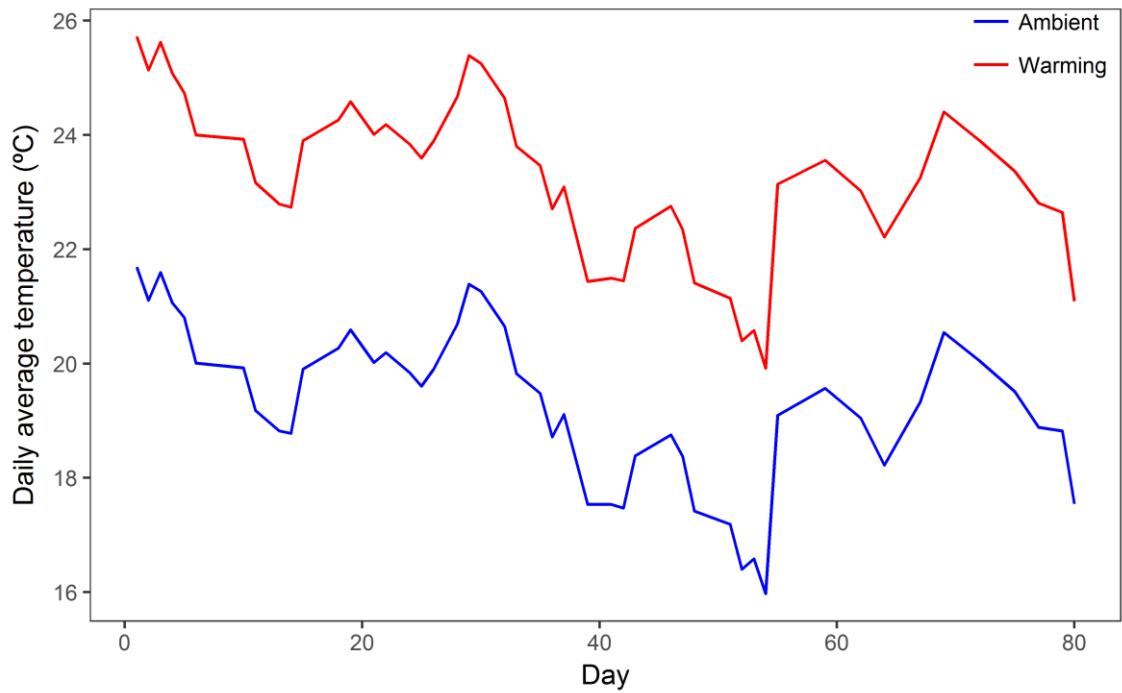

Figure S2. Temperature variation (mean per day) during the study for each temperature scenario.

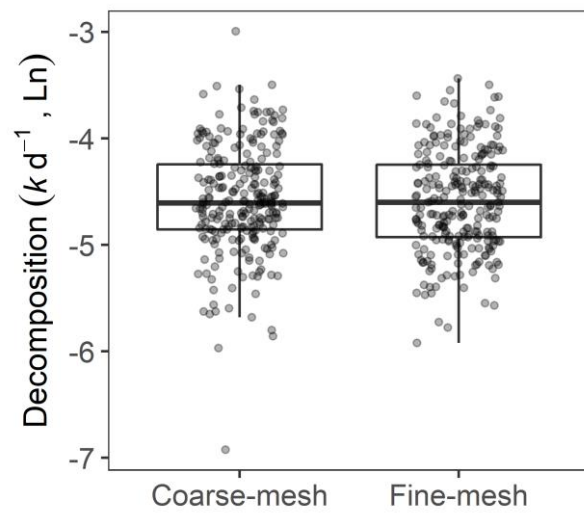

Figure S3. Leaf litter decomposition in coarse-mesh bags (accessed by microorganisms and detritivores) and fine-mesh bags (accessed by microorganisms only).

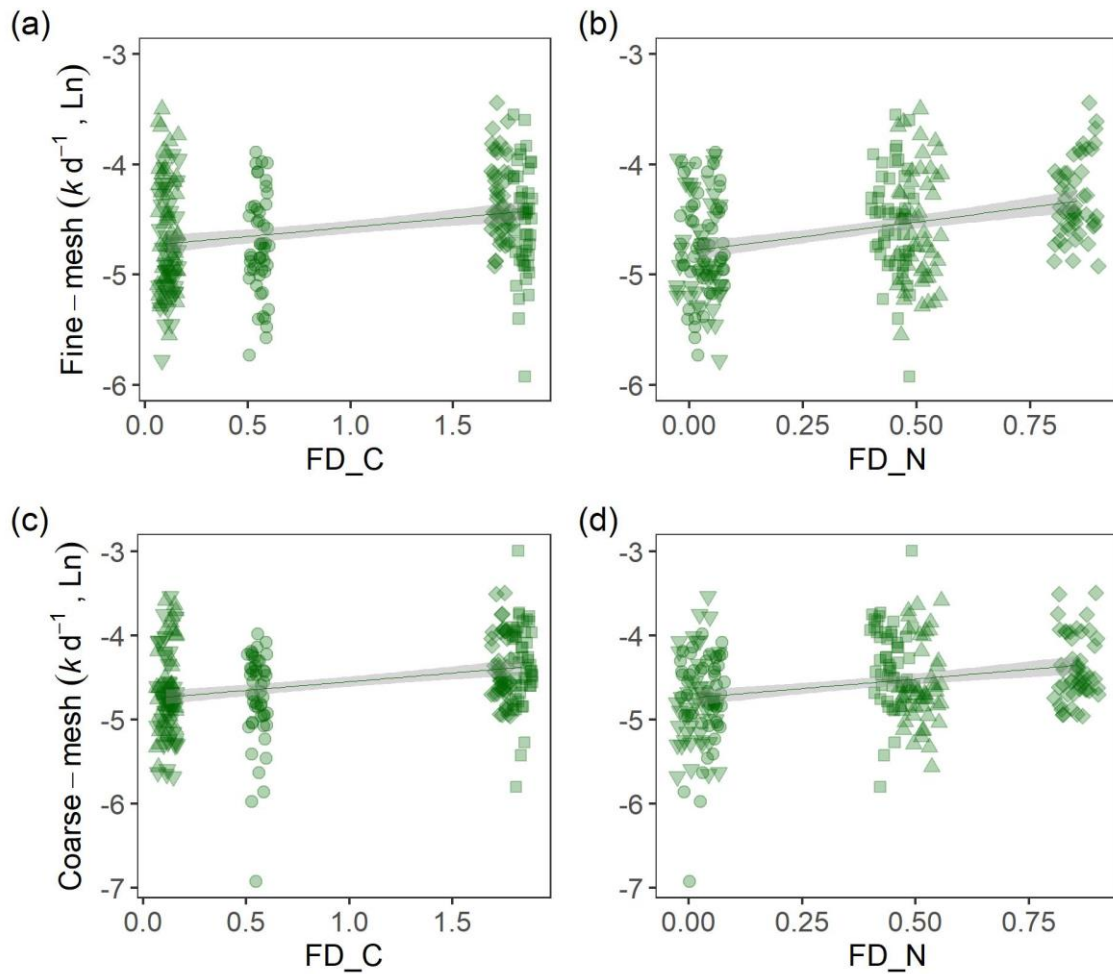

Figure S4. Decomposition rates ( $k$ ) increased with dissimilarities of C and N concentrations, and C:N ratios in (a-c) fine-mesh bags and (d-f) coarse-mesh bags. Data represent litter quality and functional diversity gradient of litter treatments (LT). Circle: LT1, square: LT2, rhombus: LT3, triangle: LT4, inverted triangle: LT5. FD = functional diversity.  $\text{FD}_C$ : carbon functional dissimilarity,  $\text{FD}_N$ : nitrogen functional dissimilarity.

Table S1. Leaf litter traits (mean  $\pm$ SD, n=3) of the 12 species used in the experiment

|                               | C                  | N                 | P                 | Lignin               | Total phenolics     | Total tannins       | C:N ratio          | N:P ratio          |
|-------------------------------|--------------------|-------------------|-------------------|----------------------|---------------------|---------------------|--------------------|--------------------|
|                               | % dry mass         | % dry mass        | g/kg dry mass     | g/kg dry mass        | g/kg dry mass       | g/kg dry mass       |                    |                    |
| <i>Jacaranda puberula</i>     | 48.8 ( $\pm$ 0.93) | 2.6 ( $\pm$ 0.38) | 1.4 ( $\pm$ 0.30) | 201.5 ( $\pm$ 8.10)  | 41.7 ( $\pm$ 4.27)  | 34.3 ( $\pm$ 4.50)  | 18.5 ( $\pm$ 2.44) | 1.85 ( $\pm$ 0.25) |
| <i>Inga sbnuda</i>            | 47.2 ( $\pm$ 0.18) | 3.3 ( $\pm$ 0.16) | 1.3 ( $\pm$ 0.14) | 325.3 ( $\pm$ 2.04)  | 100.9 ( $\pm$ 5.38) | 81.9 ( $\pm$ 4.44)  | 14.3 ( $\pm$ 0.67) | 2.50 ( $\pm$ 0.17) |
| <i>Alchornea triplinervia</i> | 45.6 ( $\pm$ 0.15) | 2.1 ( $\pm$ 0.10) | 1.0 ( $\pm$ 0.04) | 151.2 ( $\pm$ 5.81)  | 175.9 ( $\pm$ 8.31) | 169.1 ( $\pm$ 8.26) | 21.9 ( $\pm$ 1.13) | 2.02 ( $\pm$ 0.07) |
| <i>Pera glabrata</i>          | 47.4 ( $\pm$ 0.43) | 1.8 ( $\pm$ 0.11) | 0.8 ( $\pm$ 0.18) | 498.0 ( $\pm$ 22.04) | 94.7 ( $\pm$ 6.29)  | 56.6 ( $\pm$ 3.10)  | 26.5 ( $\pm$ 1.58) | 2.35 ( $\pm$ 0.65) |
| <i>Myrcia glabra</i>          | 47.7 ( $\pm$ 0.18) | 1.6 ( $\pm$ 0.07) | 0.9 ( $\pm$ 0.02) | 309.5 ( $\pm$ 4.09)  | 161.3 ( $\pm$ 4.61) | 100.5 ( $\pm$ 7.20) | 29.4 ( $\pm$ 1.16) | 1.85 ( $\pm$ 0.11) |
| <i>Myrcia racemosa</i>        | 41.6 ( $\pm$ 0.37) | 1.4 ( $\pm$ 0.04) | 0.5 ( $\pm$ 0.07) | 96.9 ( $\pm$ 8.74)   | 124.1 ( $\pm$ 6.19) | 115.0 ( $\pm$ 6.30) | 30.2 ( $\pm$ 0.71) | 2.71 ( $\pm$ 0.33) |
| <i>Andira anthelmia</i>       | 48.2 ( $\pm$ 0.20) | 3.1 ( $\pm$ 0.10) | 1.4 ( $\pm$ 0.12) | 338.1 ( $\pm$ 3.74)  | 43.1 ( $\pm$ 2.58)  | 37.0 ( $\pm$ 2.33)  | 15.5 ( $\pm$ 0.51) | 2.27 ( $\pm$ 0.17) |
| <i>Abarema brachystachya</i>  | 47.2 ( $\pm$ 0.07) | 3.1 ( $\pm$ 0.10) | 1.1 ( $\pm$ 0.09) | 238.8 ( $\pm$ 2.12)  | 21.7 ( $\pm$ 1.29)  | 14.7 ( $\pm$ 0.94)  | 15.1 ( $\pm$ 0.49) | 2.80 ( $\pm$ 0.17) |
| <i>Cupania oblongifolia</i>   | 48.2 ( $\pm$ 0.75) | 2.0 ( $\pm$ 0.10) | 1.3 ( $\pm$ 0.26) | 362.3 ( $\pm$ 5.59)  | 84.0 ( $\pm$ 10.77) | 69.7 ( $\pm$ 8.46)  | 24.1 ( $\pm$ 1.35) | 1.56 ( $\pm$ 0.30) |
| <i>Miconia</i> sp.            | 44.3 ( $\pm$ 0.57) | 1.8 ( $\pm$ 0.06) | 0.8 ( $\pm$ 0.06) | 308.1 ( $\pm$ 3.51)  | 101.1 ( $\pm$ 6.59) | 91.5 ( $\pm$ 6.72)  | 24.3 ( $\pm$ 0.95) | 2.31 ( $\pm$ 0.14) |
| <i>Inga edulis</i>            | 46.3 ( $\pm$ 0.35) | 3.3 ( $\pm$ 0.10) | 1.9 ( $\pm$ 0.20) | 350.7 ( $\pm$ 0.88)  | 59.4 ( $\pm$ 8.71)  | 41.6 ( $\pm$ 6.48)  | 13.8 ( $\pm$ 0.50) | 1.80 ( $\pm$ 0.19) |
| <i>Lacistema pubescens</i>    | 45.1 ( $\pm$ 0.15) | 2.0 ( $\pm$ 0.08) | 1.2 ( $\pm$ 0.02) | 256.1 ( $\pm$ 18.07) | 77.2 ( $\pm$ 5.83)  | 61.5 ( $\pm$ 4.67)  | 22.5 ( $\pm$ 0.80) | 1.71 ( $\pm$ 0.04) |

Table S2. Total abundance of macroinvertebrate morphospecies collected inside the coarse-mesh bags (n = 5) per time, litter treatment (LT) and temperature.

| Family          | Morphosp.    | time    |         |         |         |         | LT  |     |     |     |     | Temperature |         |
|-----------------|--------------|---------|---------|---------|---------|---------|-----|-----|-----|-----|-----|-------------|---------|
|                 |              | 16 days | 32 days | 48 days | 64 days | 80 days | LT1 | LT2 | LT3 | LT4 | LT5 | Ambient     | Warming |
| Psychodidae     | psychod_2    | 24      | 30      | 24      | 11      | 13      | 12  | 28  | 44  | 13  | 5   | 63          | 39      |
| Tubificidae     | oligoch_1    | 109     | 296     | 82      | 137     | 93      | 152 | 142 | 206 | 134 | 83  | 339         | 378     |
| Chironomidae    | orthoclad    | 46      | 157     | 171     | 167     | 130     | 92  | 144 | 188 | 118 | 129 | 406         | 265     |
| Psychodidae     | psychod_5    | 5       | 0       | 0       | 1       | 0       | 0   | 0   | 5   | 1   | 1   | 5           |         |
| Limoniidae      | trentepohlia | 20      | 26      | 38      | 51      | 42      | 53  | 31  | 47  | 18  | 28  | 91          | 86      |
| Chironomidae    | p_kaingang   | 12      | 14      | 20      | 13      | 21      | 8   | 25  | 37  | 3   | 7   | 33          | 47      |
| Psychodidae     | psychod_4    | 8       | 2       | 0       | 0       | 0       | 1   | 2   | 6   | 1   | 0   | 3           | 7       |
| Ceratopogonidae | atrichop_2   | 5       | 52      | 19      | 4       | 3       | 19  | 13  | 28  | 9   | 14  | 61          | 22      |
| Chironomidae    | p_marcond    | 6       | 73      | 84      | 100     | 69      | 31  | 57  | 70  | 97  | 77  | 101         | 231     |
| Culicidae       | culex_1      | 4       | 9       | 11      | 3       | 0       | 3   | 10  | 6   | 7   | 1   | 18          | 9       |
| Culicidae       | anopheles    | 2       | 0       | 1       | 0       | 1       | 0   | 0   | 0   | 2   | 2   | 2           | 2       |
| Scirtidae       | scirtes      | 3       | 3       | 11      | 11      | 3       | 3   | 6   | 3   | 12  | 7   | 11          | 20      |
| Psychodidae     | psychod_1    | 5       | 11      | 4       | 2       | 0       | 1   | 12  | 3   | 1   | 5   | 8           | 14      |
| Sciaridae       | sciarid      | 8       | 1       | 1       | 0       | 0       | 0   | 0   | 0   | 3   | 7   | 9           | 1       |
| Ephydriidae     | ephydrid     | 1       | 0       | 0       | 0       | 0       | 0   | 0   | 1   | 0   | 0   | 0           | 1       |
| Culicidae       | culex_2      | 2       | 0       | 1       | 0       | 0       | 0   | 3   | 0   | 0   | 0   | 1           | 2       |
| Ceratopogonidae | atrichop_5   | 1       | 14      | 5       | 3       | 0       | 3   | 1   | 4   | 2   | 13  | 17          | 6       |
| Culicidae       | wyeomyia     | 0       | 1       | 0       | 2       | 0       | 1   | 1   | 0   | 0   | 1   | 3           | 0       |
| Ceratopogonidae | atrichop_3   | 0       | 6       | 7       | 3       | 0       | 4   | 0   | 3   | 3   | 6   | 3           | 13      |
| Anisopodidae    | olbiogaster  | 0       | 1       | 0       | 1       | 2       | 1   | 1   | 1   | 1   | 0   | 2           | 2       |
| Tubificidae     | oligoch_2    | 0       | 5       | 2       | 9       | 0       | 3   | 0   | 0   | 5   | 8   | 0           | 16      |
| Culicidae       | culex_5      | 0       | 0       | 3       | 0       | 1       | 0   | 0   | 0   | 3   | 1   | 4           | 0       |
| Limnocytheridae | elpidium     | 0       | 0       | 1       | 0       | 0       | 1   | 0   | 0   | 0   | 0   | 0           | 1       |
| Ceratopogonidae | atrichop_1   | 0       | 0       | 0       | 1       | 0       | 0   | 0   | 0   | 1   | 0   | 0           | 1       |
